# Supplementary material for: Variation in Water-Holding Capacity in Sphagnum Species Depends on Both Plant and Colony Structure
Source: MDPI journal article supplement (doi:10.3390/plants13081061), 2024-04-09
Supplement: s1 [file s1]

## Supplementary material

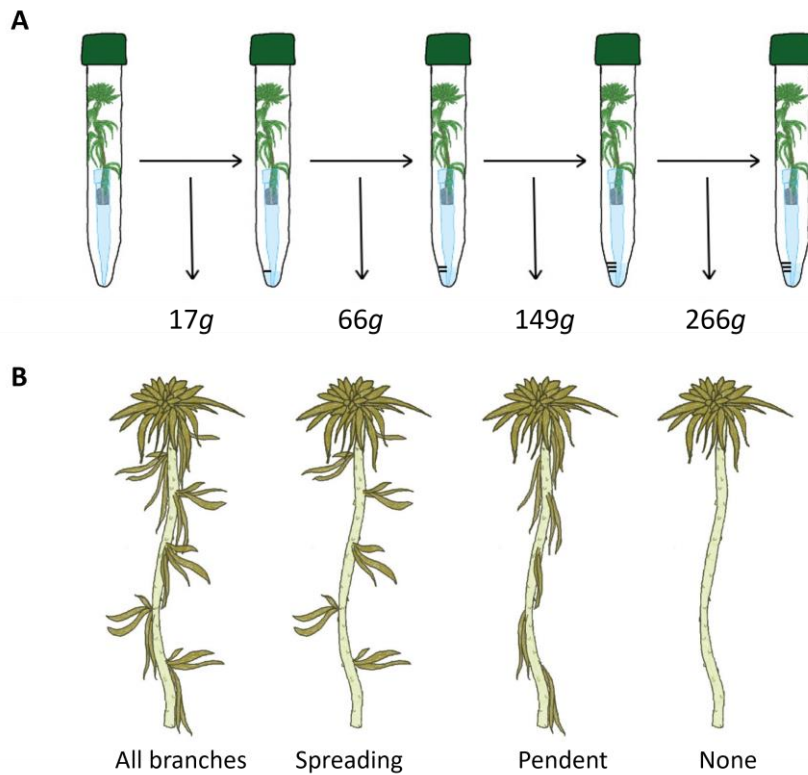

**Figure S1.** **A.** Diagram illustrating the set up for water removal by centrifugation (please see methods for details). **B.** Diagram illustrating branch removal of *Sphagnum* plants before centrifugation.

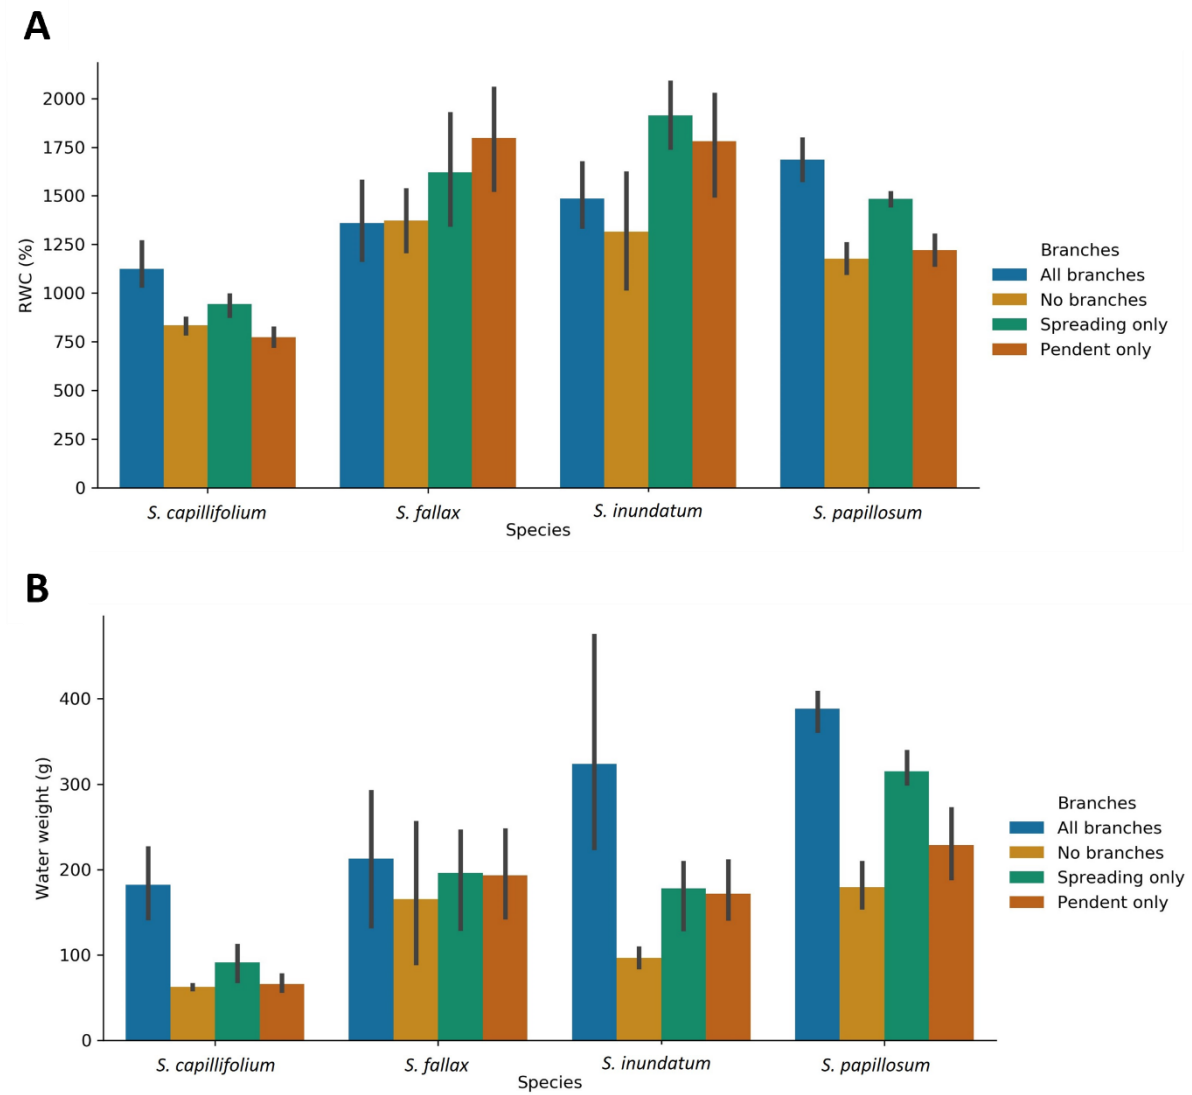

**Figure S2. A.** Plant water content, expressed in grams of water per gram of dry weight, is not affected by branch removal for the four *Sphagnum* species as indicated. **B.** Total amount of water stored in whole plants or plants where the branches have been selectively removed as indicated.

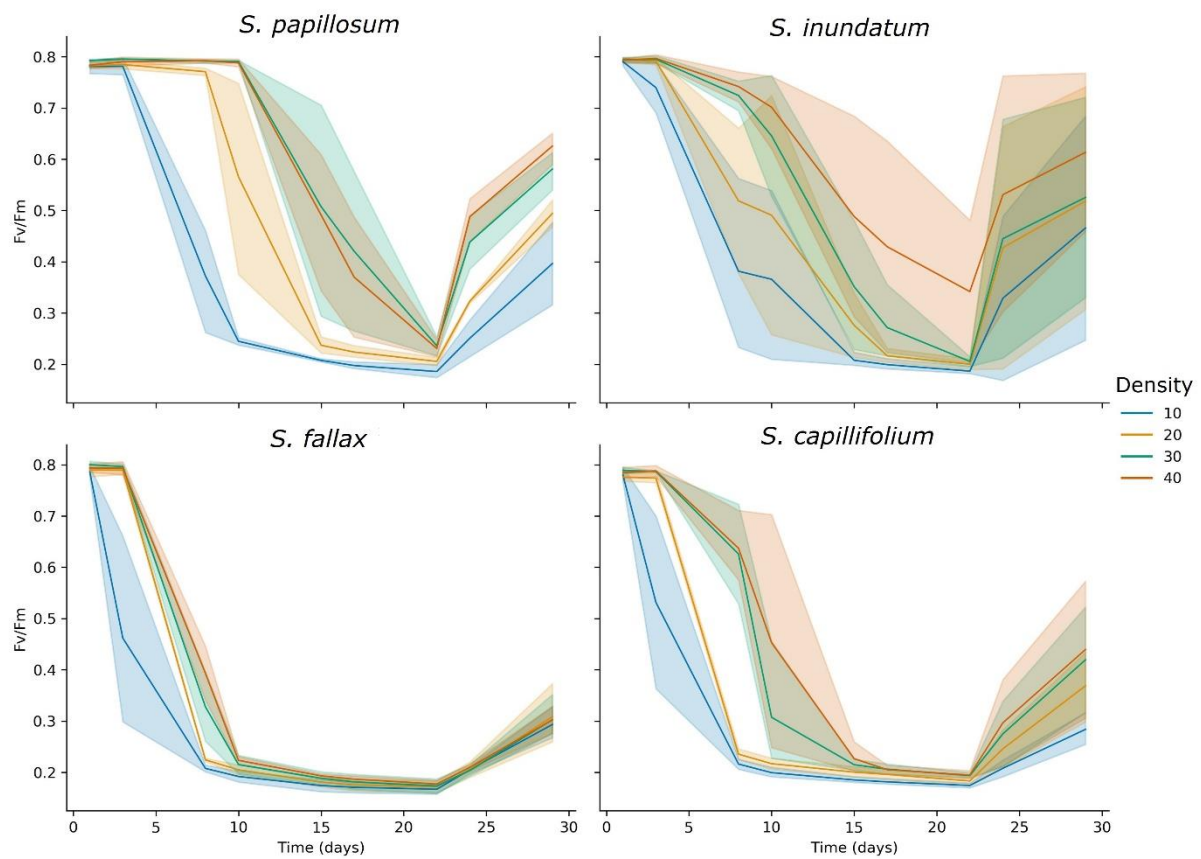

**Figure S3.** Effect of manipulated canopy density on plant heath as measured by the chlorophyll fluoresce index  $F_v/F_m$  during an imposed drought scenario. Plants in cosms at the indicated stem density for each species were subjected to water withdrawal for 21 days after which they were re-watered.  $F_v/F_m$  was calculated at different time points during the experiment. Lines represent the mean and the shaded areas the 95% confidence interval for each sample.

**Table S1:** Statistical analysis for the data presented in Figures 2 and 3.

| Figure 2A. Within species comparison  |                  |                  |           |              |               |     |
|---------------------------------------|------------------|------------------|-----------|--------------|---------------|-----|
| <i>g</i>                              |                  | 0                | 17        | 66           | 149           | 266 |
| S. capillifolium                      | 300              | ns               | -         | ns           | ns            | *   |
|                                       | 600              | **               | ns        | -            | ns            | ns  |
|                                       | 900              | **               | ns        | ns           | -             | ns  |
|                                       | 1500             | **               | *         | ns           | ns            | -   |
| S. fallax                             | 300              | ns               | -         | ns           | ns            | ns  |
|                                       | 600              | *                | ns        | -            | ns            | ns  |
|                                       | 900              | *                | ns        | ns           | -             | ns  |
|                                       | 1500             | **               | ns        | ns           | ns            | -   |
| S. inundatum                          | 300              | **               | -         | **           | **            | **  |
|                                       | 600              | **               | **        | -            | ns            | ns  |
|                                       | 900              | **               | **        | ns           | -             | ns  |
|                                       | 1500             | **               | **        | ns           | ns            | -   |
| S. papillosum                         | 300              | **               | -         | **           | **            | **  |
|                                       | 600              | **               | **        | -            | ns            | ns  |
|                                       | 900              | **               | **        | ns           | -             | ns  |
|                                       | 1500             | **               | **        | ns           | ns            | -   |
| Figure 2A. Between species comparison |                  |                  |           |              |               |     |
|                                       |                  | S. capillifolium | S. fallax | S. inundatum | S. papillosum |     |
| 17g                                   | S. capillifolium | -                | ns        | *            | **            |     |
|                                       | S. fallax        | ns               | -         | ns           | *             |     |
|                                       | S. inundatum     | *                | ns        | -            | *             |     |
|                                       | S. papillosum    | **               | *         | *            | -             |     |
| 66g                                   | S. capillifolium | -                | ns        | **           | **            |     |
|                                       | S. fallax        | ns               | -         | ns           | **            |     |
|                                       | S. inundatum     | **               | ns        | -            | *             |     |
|                                       | S. papillosum    | **               | **        | *            | -             |     |
| 149g                                  | S. capillifolium | -                | ns        | **           | **            |     |
|                                       | S. fallax        | ns               | -         | ns           | **            |     |
|                                       | S. inundatum     | **               | ns        | -            | **            |     |
|                                       | S. papillosum    | **               | **        | **           | -             |     |
| 266g                                  | S. capillifolium | -                | ns        | **           | **            |     |
|                                       | S. fallax        | ns               | -         | ns           | **            |     |
|                                       | S. inundatum     | **               | ns        | -            | **            |     |
|                                       | S. papillosum    | **               | **        | **           | -             |     |
| Figure 3A. No Branches                |                  |                  |           |              |               |     |
| <i>g</i>                              |                  | 0                | 17        | 66           | 149           | 266 |
| S. capillifolium                      | 300              | ns               | -         | ns           | *             | **  |
|                                       | 600              | ns               | ns        | -            | ns            | ns  |
|                                       | 900              | *                | *         | ns           | -             | ns  |
|                                       | 1500             | **               | **        | ns           | ns            | -   |
| S. fallax                             | 300              | ns               | -         | *            | *             | *   |
|                                       | 600              | **               | *         | -            | ns            | ns  |
|                                       | 900              | **               | *         | ns           | -             | ns  |
|                                       | 1500             | **               | *         | ns           | ns            | -   |
| S. inundatum                          | 300              | *                | -         | **           | **            | **  |
|                                       | 600              | **               | **        | -            | ns            | *   |
|                                       | 900              | **               | **        | ns           | -             |     |
|                                       | 1500             | **               | **        | *            | ns            |     |
| S. papillosum                         | 300              | *                | -         | *            | *             | *   |
|                                       | 600              | **               | *         | -            | ns            | ns  |
|                                       | 900              | **               | *         | ns           | -             | ns  |
|                                       | 1500             | **               | *         | ns           | ns            | -   |
| Figure 3B. Spreading only             |                  |                  |           |              |               |     |
| <i>g</i>                              |                  | 0                | 17        | 66           | 149           | 266 |
| S. capillifolium                      | 300              | ns               | -         | *            | *             | **  |
|                                       | 600              | *                | *         | -            | ns            | ns  |
|                                       | 900              | *                | *         | ns           | -             | ns  |
|                                       | 1500             | **               | **        | ns           | ns            | -   |
| S. fallax                             | 300              | **               | -         | ns           | ns            | ns  |
|                                       | 600              | **               | ns        | -            | ns            | ns  |
|                                       | 900              | **               | ns        | ns           | -             | ns  |
|                                       | 1500             | **               | ns        | ns           | ns            | -   |
| S. inundatum                          | 300              | **               | -         | **           | **            | **  |
|                                       | 600              | **               | **        | -            | ns            | ns  |
|                                       | 900              | **               | **        | ns           | -             | ns  |
|                                       | 1500             | **               | **        | ns           | ns            | -   |
| S. papillosum                         | 300              | **               | -         | **           | **            | **  |
|                                       | 600              | **               | **        | -            | ns            | ns  |
|                                       | 900              | **               | **        | ns           | -             | ns  |
|                                       | 1500             | **               | **        | ns           | ns            | -   |
| Figure 3C. Pendent only               |                  |                  |           |              |               |     |
| <i>g</i>                              |                  | 0                | 17        | 66           | 149           | 266 |
| S. capillifolium                      | 300              | ns               | -         | ns           | **            | **  |
|                                       | 600              | ns               | ns        | -            | *             | *   |
|                                       | 900              | **               | **        | *            | -             | ns  |
|                                       | 1500             | **               | **        | *            | ns            | -   |
| S. fallax                             | 300              | **               | -         | ns           | ns            | ns  |
|                                       | 600              | **               | ns        | -            | ns            | ns  |
|                                       | 900              | **               | ns        | ns           | -             | ns  |
|                                       | 1500             | **               | ns        | ns           | ns            | -   |
| S. inundatum                          | 300              | **               | -         | ns           | ns            | ns  |
|                                       | 600              | **               | ns        | -            | ns            | ns  |
|                                       | 900              | **               | ns        | ns           | -             | ns  |
|                                       | 1500             | **               | ns        | ns           | ns            | -   |
| S. papillosum                         | 300              | **               | -         | ns           | **            | **  |
|                                       | 600              | **               | ns        | -            | ns            | ns  |
|                                       | 900              | **               | **        | ns           | -             | ns  |
|                                       | 1500             | **               | **        | ns           | ns            | -   |
